# Supplementary material for: Hubs with Network Motifs Organize Modularity Dynamically in the Protein-Protein Interaction Network of Yeast
Source: PubMed Central journal article supplement (PMC2065901; doi:10.1371/journal.pone.0001207), 2007-11-21
Supplement: pone.0001207.s001.pdf [file pone.0001207.s001.pdf]

# TextS1 for ‘Hubs with network motifs organize modularity dynamically in a protein interaction network of yeast’

Guangxu Jin<sup>1,2</sup> Shihua Zhang<sup>1,2</sup> Xiang-Sun Zhang<sup>1\*</sup> Luonan Chen<sup>3,4,5\*</sup>

## 1 Sparse connection of motifs for mDHs and dense connection of motifs for mPHs

In the  $HC^{fyi}$  network, an mDH or an mPH almost has the same number of partners ( Mean of mDH’s degree is 16.99 and Mean of mPH’s degree is 17.64.  $p = 0.4922$  for student t-test) (see Figure S2A). This is in contrast to the result in FYI of Han et al. that a date hub has more partners than a party hub. Moreover, the network motifs of mPHs are more significantly dense than those of mDHs (Mean of mDH’s cluster coefficients is 0.1654 and Mean of mPH’s cluster coefficients is 0.1654.  $p < 10^{-6}$  for student t-test) (see Figure S2B). Thus, the motifs of mDHs are connected sparsely and the motifs of mPHs are connected densely.

## 2 The motifs of an mPH have higher probability performing the same function than those of an mDH.

Function<sub>ratio-same</sub>s of mDHs and mPHs are shown in Figure S3. Clearly, Function<sub>ratio-same</sub>s of mDHs are significantly different from ones of mPHs (mean of mDHs: 0.1722, mean of mPHs: 0.4500,  $p < 10^{-8}$  for Mann-Whitney U test). Furthermore, the different localization preferences for the motifs of mPHs and mDHs may explain this result. The reason why the motifs of mPHs have similar functions is that mPHs with their motifs are likely to be inside ‘nucleus’ and mainly perform the functions within the ‘nucleus’, which allows the motifs of mPHs to have the same functions. In contrast, the motifs of mDHs are likely to be located outside the ‘nucleus’ and perform different tasks, thereby functioning in different ways.

As shown in above, by network motifs, mPHs and mDHs not only display their different roles in controlling the network topological structure and characterizing the functions of modules, but also show their different natures in co-expression and co-function. In the following, we will make further analysis about the important roles of mPHs and mDHs in controlling the network topological structure as well as modules.

## 3 About 90% mDHs link with more than 2 pathways.

In Figure S1, we can easily find that about 90% can link with more than 2 signal pathways and the mean of mDHs’ degrees in Figure 5 is 4.3 (see Figure S1).

---

\*corresponding author: zxs@amt.ac.cn, chen@eic.osaka-sandai.ac.jp

## 4 The network motifs of mDHs and mPHs are essential to the functions of signal or metabolic pathways.

In Figure 5, for convenience, we call the center 26 pathways as ‘DP-pathways’ that involve the motif proteins of both mDHs and mPHs, the above 14 pathways as ‘D-pathways’ that only involve the motif proteins of mDHs, and the other 26 pathways in Table 2 as ‘B-pathways’ that do not involve any motif protein of mDHs or mPHs.

### 4.1 mPHs with their motifs are the weatherglass to the functions of signal or metabolic pathways.

As shown in Figure 2, the motifs of an mPH prefer to ‘nucleus’ and tend to stay together with the mPH. Therefore, not surprisingly, the motifs of mPHs are only connected to DP-pathways, and are related to less than half of the pathways. Interestingly, in Table S3, the number of mPHs, at least one of whose motif proteins are involved in some DP-pathway, can represent the extent of the correlation between the pathway and ‘nucleus’.

DP-pathways with a large number of mPHs are mainly responsible for the biochemical reactions in ‘nucleus’. In the first part of Table S3, it is clear that the number of mPHs involved in these DP-pathways is high. A striking feature of the pathways is that most of them are critical to DNA, RNA and the transcription process in ‘nucleus’. First, ‘Purine’ and ‘Pyrimidine’ metabolism are needed to make DNA and RNA, and ‘Folate biosynthesis’ is to synthesize DNA and RNA. Second, ‘Basal transcription factors’ and ‘RNA polymerase’ are responsible for the transcription of DNA. Third, ‘Proteasome’ can degrade the proteins in ‘nucleus’. In addition, ‘Cell cycle’ is to divide the cell, including the division of ‘nucleus’. Therefore, the important feature of these DP-pathways with a large number of mPHs is that their biochemical reactions are mainly related to the ‘nucleus’.

DP-pathways with a small number of mPHs are mainly responsible for the biochemical reactions in ‘organelle’ and ‘cytoplasm’. As shown in the second part of Table S3, the number of mPHs involved in these DP-pathways is low. A striking feature of these DP-pathway is that their biochemical activities are related to the translation of proteins, folding, sorting and degradation of proteins, as well as energy and carbohydrate metabolism, which mainly occur in the ‘organelle’ and ‘cytoplasm’ of a cell. First, ‘Ribosome’, ‘Alanine and aspartate metabolism’, ‘Valine, leucine and isoleucine biosynthesis’ are needed to translate mRNAs to proteins. Moreover, ‘Ubiquitin mediated proteolysis’ and ‘SNARE interactions in vesicular transport’ degrade or fold the proteins. Second, ‘Oxidative phosphorylation’ is the ‘Energy Metabolism’, which occurs in the ‘mitochondria’, and ‘MAPK signaling pathway’ is a ‘Signal Transduction’, in which the initiating event occurs at the cell surface, but the final event occurs in the nucleus. Third, the others mainly contribute to the ‘Carbohydrate Metabolism’, such as that ‘Glycolysis / Gluconeogenesis’, ‘Pyruvate metabolism’, ‘Butanoate metabolism’, ‘Pentose phosphate pathway’, ‘Fructose and mannose metabolism’ and ‘Galactose metabolism’. Therefore, the DP-pathways perform their biochemical role in ‘organelle’ and ‘cytoplasm’.

D-pathways and B-pathways with no mPH are mainly responsible for the biochemical reactions between the surface of a cell or membrane and ‘cytoplasm’. There are 40 pathways with no mPH in the third part of Table S3 and in Table S2, which include ‘Amino Acids Metabolism’ (13 pathways), ‘Metabolism of Other Amino Acids’ (2 pathways), ‘Lipid Metabolism’ (5 pathways), ‘Glycan Biosynthesis and Metabolism’ (6 pathways), ‘Energy Metabolism’ (2 pathways), ‘Carbohydrate Metabolism’ (3 pathways) and others (see Table S4). It should be noted that the lipid is the main component of membrane proteins, such as that ‘Fatty acid metabolism’ in ‘Lipid Metabolism’ takes the fatty acids from the extracellular to intracellular through the ‘membrane’. Therefore, the pathways contribute not only to the metabolism of amino acids but also to the transducing and storing energy, which mainly come from the outside of the cell.

As a result, the presence of mPHs is an important signal which can indicate the functions of

pathways. More mPHs a pathway includes, more larger the extent of the correlation is between the pathway and ‘nucleus’. Therefore, the mPHs can be viewed as a weatherglass, which tells us whether a pathway is related to ‘nucleus’ in a cell.

#### **4.2 DP-pathways in ‘nucleus’ are more likely related to mPHs’ motif proteins while DP-pathways outside ‘nucleus’ prefer to mDHs’ motif proteins.**

Interestingly, in Table S3, the contribution of mPHs to DP-pathways in ‘nucleus’ is larger than that of mDHs (mean of mPHs: 41.6667, mean of mDHs: 21.8333,  $P < 0.01$  for Wilcoxon rank sum test), whereas the contribution of mPHs to DP-pathways outside ‘nucleus’ is smaller than that of mDHs (mean of mPHs: 2.3571, mean of mDHs: 6.7857,  $P < 0.01$  for Wilcoxon rank sum test). Now, we can conclude that the DP-pathways in ‘nucleus’ and ‘cytoplasm’ mainly involve the motifs of mPHs and mDHs respectively. The different tasks of the pathways in ‘nucleus’ and ‘cytoplasm’ can explain this interesting result. Since the elementary characteristic of ‘nucleus’ is to store the most important information of heredity in DNA, as well as facilitating transcription of DNA, thereby the pathways or metabolism related to ‘nucleus’ mainly accomplish the transcription of DNA within ‘nucleus’. But the pathways outside ‘nucleus’ not only facilitate the tasks to obtain the code for protein translation, such as mRNA, but also need amino acids and energies from the outer world of the cell. Therefore, the pathways in ‘nucleus’ that perform the constrained task, i.e. transcription of DNA and preparation for protein translation inside the ‘nucleus’, involve more mPHs, whose motifs tend to stay together with mPHs, while the pathways outside ‘nucleus’ that need to reach a relatively large world to accomplish different tasks across the cell involve more mDHs, whose motifs tend to spread to other localizations of the cell.

In Table S3, an important feature of DP-pathways is that some of them related to ‘nucleus’ have motif proteins for most mPHs and mDHs, such as ‘Basal transcription factors’, ‘Purine metabolism’, ‘Pyrimidine metabolism’, ‘RNA polymerase’, ‘Cell cycle’, ‘Folate biosynthesis’, ‘Ribosome’ and ‘DNA polymerase’. The above 8 DP-pathways include motif proteins for 70 mDHs and 86 mDHs. In contrast, the other 18 DP-pathways and 14 D-pathways in Table S3 all together include motif proteins for 61 mDHs and 76 mDHs. The result implies that most mDHs and mPHs are essential to the pathways related to ‘nucleus’.

As a result, the number of mPHs whose motifs are involved in a pathway is a weatherglass which can tell whether the biochemical reaction of the pathway is related to ‘nucleus’. Moreover, the pathways in ‘nucleus’ involve more mPHs’ motif proteins whereas the pathways outside ‘nucleus’ involve more mDHs’ motif proteins. Furthermore, many motif proteins for most mPHs and mDHs are favorite of some of DP-pathways in ‘nucleus’.

Table S2: The linkages of the 26 pathways that motif proteins of mDHs and mPHs are not involved in

| No. of pathways | pathways                                              | proteins connected to motifs of mDHs       | proteins connected to motifs of mPHs |
|-----------------|-------------------------------------------------------|--------------------------------------------|--------------------------------------|
| 00071           | Fatty acid metabolism                                 | YOL086C                                    |                                      |
| 00120           | Bile acid biosynthesis                                | YOL086C                                    |                                      |
| 00561           | Glycerolipid metabolism                               | YOL086C                                    |                                      |
| 00980           | Metabolism of xenobiotics by cytochrome P450          | YOL086C                                    |                                      |
| 00061           | Fatty acid                                            | YNR016C                                    |                                      |
| 00710           | Carbon fixation                                       | YAL038W                                    |                                      |
| 03060           | Protein export                                        | YDL092W YDR292C<br>YPL210C YPL243W YPR088C |                                      |
| 00513           | High-mannose type N-glycan biosynthesis               | YEL036C                                    |                                      |
| 00251           | Glutamate metabolism                                  | YJR109C YGL245W                            |                                      |
| 00860           | Porphyrin and chlorophyll metabolism                  | YGL245W                                    |                                      |
| 00970           | Aminoacyl-tRNA biosynthesis biosynthesis              | YGL245W YGR264C                            |                                      |
| 00640           | Propanoate metabolism                                 | YNR016C                                    |                                      |
| 02021           | Two-component system - Organism-specific              | YLR006C                                    |                                      |
| 00020           | Citrate cycle (TCA cycle)                             | YFL018C YIL125W                            |                                      |
| 00260           | Glycine, serine and threonine metabolism              | YFL018C YER052C                            | YER052C                              |
| 00310           | Lysine degradation                                    | YIL125W                                    |                                      |
| 00300           | Lysine biosynthesis                                   | YER052C                                    | YER052C                              |
| 00271           | Methionine metabolism                                 | YGR264C                                    |                                      |
| 00220           | Urea cycle and metabolism of amino groups             | YBR208C                                    | YBR208C                              |
| 00910           | Nitrogen metabolism                                   | YPR145W                                    | YPR145W                              |
| 00770           | Pantothenate and CoA biosynthesis                     |                                            |                                      |
| 00563           | Glycosylphosphatidylinositol(GPI)-anchor biosynthesis |                                            |                                      |
| 01031           | Glycan structures - biosynthesis 2                    |                                            |                                      |
| 00400           | Phenylalanine, tyrosine and tryptophan biosynthesis   |                                            |                                      |
| 00330           | Arginine and proline metabolism                       |                                            |                                      |
| 00530           | Aminosugars metabolism                                |                                            |                                      |

No. of Pathways and names of Pathways are obtained from KEGG database [?].

Table S3: DP-pathways and D-pathways

| No. of pathways | pathways                                    | NDH | NPH |
|-----------------|---------------------------------------------|-----|-----|
| 03022           | Basal transcription factors                 | 25  | 67  |
| 00230           | Purine metabolism                           | 35  | 58  |
| 00240           | Pyrimidine metabolism                       | 32  | 58  |
| 03020           | RNA polymerase                              | 22  | 56  |
| 04111           | Cell cycle - yeast                          | 36  | 51  |
| 03050           | Proteasome                                  | 11  | 43  |
| 00500           | Starch and sucrose metabolism               | 33  | 39  |
| 00790           | Folate biosynthesis                         | 30  | 36  |
| 04070           | Phosphatidylinositol signaling system       | 13  | 26  |
| 00562           | Inositol phosphate metabolism               | 8   | 22  |
| 00632           | Benzoate degradation via CoA ligation       | 9   | 22  |
| 00760           | Nicotinate and nicotinamide metabolism      | 8   | 22  |
| 03010           | Ribosome                                    | 15  | 4   |
| 00010           | Glycolysis / Gluconeogenesis                | 7   | 4   |
| 04120           | Ubiquitin mediated proteolysis              | 6   | 3   |
| 00252           | Alanine and aspartate metabolism            | 4   | 3   |
| 00290           | Valine, leucine and isoleucine biosynthesis | 4   | 3   |
| 00620           | Pyruvate metabolism                         | 4   | 3   |
| 00650           | Butanoate metabolism                        | 4   | 3   |
| 04010           | MAPK signaling pathway                      | 21  | 2   |
| 03030           | DNA polymerase                              | 15  | 2   |
| 00190           | Oxidative phosphorylation                   | 1   | 2   |
| 00030           | Pentose phosphate pathway                   | 2   | 1   |
| 00051           | Fructose and mannose metabolism             | 2   | 1   |
| 00052           | Galactose metabolism                        | 2   | 1   |
| 04130           | SNARE interactions in vesicular transport   | 8   | 1   |
| 00280           | Valine, leucine and isoleucine degradation  | 1   | 0   |
| 00350           | Tyrosine metabolism                         | 4   | 0   |
| 00360           | Phenylalanine metabolism                    | 1   | 0   |
| 00564           | Glycerophospholipid metabolism              | 1   | 0   |
| 00624           | 1- and 2-Methylnaphthalene degradation      | 1   | 0   |
| 00903           | Limonene and pinene degradation             | 1   | 0   |
| 00960           | Alkaloid biosynthesis II                    | 1   | 0   |
| 04140           | Regulation of autophagy                     | 2   | 0   |
| 00340           | Histidine metabolism                        | 3   | 0   |
| 00380           | Tryptophan metabolism                       | 3   | 0   |
| 00440           | Aminophosphonate metabolism                 | 3   | 0   |
| 00450           | Selenoamino acid metabolism                 | 3   | 0   |
| 00510           | N-Glycan biosynthesis                       | 1   | 0   |
| 01030           | Glycan structures - biosynthesis 1          | 1   | 0   |

No. of Pathways and names of Pathways are obtained from KEGG database [?]. NDH: the number of mDHs whose motifs are involved in. NPH: the number of mPHs whose motifs are involved in.

| No. of pathways | Pathways                                              | Pathway catalogs                          |
|-----------------|-------------------------------------------------------|-------------------------------------------|
| 00280           | Valine, leucine and isoleucine degradation            | Amino Acid Metabolism                     |
| 00350           | Tyrosine metabolism                                   | Amino Acid Metabolism                     |
| 00360           | Phenylalanine metabolism                              | Amino Acid Metabolism                     |
| 00564           | Glycerophospholipid metabolism                        | Lipid Metabolism                          |
| 00624           | 1- and 2-Methylnaphthalene degradation                | Xenobiotics Biodegradation and Metabolism |
| 00903           | Limonene and pinene degradation                       | Biosynthesis of Secondary Metabolites     |
| 00960           | Alkaloid biosynthesis II                              | Biosynthesis of Secondary Metabolites     |
| 04140           | Regulation of autophagy                               | Folding, Sorting and Degradation          |
| 00340           | Histidine metabolism                                  | Amino Acid Metabolism                     |
| 00380           | Tryptophan metabolism                                 | Amino Acid Metabolism                     |
| 00440           | Aminophosphonate metabolism                           | Metabolism of Other Amino Acids           |
| 00450           | Selenoamino acid metabolism                           | Metabolism of Other Amino Acids           |
| 00510           | N-Glycan biosynthesis                                 | Glycan Biosynthesis and Metabolism        |
| 01030           | Glycan structures - biosynthesis 1                    | Glycan Biosynthesis and Metabolism        |
| 00071           | Fatty acid metabolism                                 | Lipid Metabolism                          |
| 00120           | Bile acid biosynthesis                                | Lipid Metabolism                          |
| 00561           | Glycerolipid metabolism                               | Lipid Metabolism                          |
| 00980           | Metabolism of xenobiotics by cytochrome P450          | Xenobiotics Biodegradation and Metabolism |
| 00061           | Fatty acid                                            | Lipid Metabolism                          |
| 00710           | Carbon fixation                                       | Energy Metabolism                         |
| 03060           | Protein export                                        | Folding, Sorting and Degradation          |
| 00513           | High-mannose type N-glycan biosynthesis               | Glycan Biosynthesis and Metabolism        |
| 00251           | Glutamate metabolism                                  | Amino Acid Metabolism                     |
| 00860           | Porphyrin and chlorophyll metabolism                  | Metabolism of Cofactors and Vitamins      |
| 00970           | Aminoacyl-tRNA biosynthesis biosynthesis              | Translation                               |
| 00640           | Propanoate metabolism                                 | Carbohydrate Metabolism                   |
| 02021           | Two-component system - Organism-specific              | Signal Transduction                       |
| 00020           | Citrate cycle (TCA cycle)                             | Carbohydrate Metabolism                   |
| 00260           | Glycine, serine and threonine metabolism              | Amino Acid Metabolism                     |
| 00310           | Lysine degradation                                    | Amino Acid Metabolism                     |
| 00300           | Lysine biosynthesis                                   | Amino Acid Metabolism                     |
| 00271           | Methionine metabolism                                 | Amino Acid Metabolism                     |
| 00220           | Urea cycle and metabolism of amino groups             | Amino Acid Metabolism                     |
| 00910           | Nitrogen metabolism                                   | Energy Metabolism                         |
| 00770           | Pantothenate and CoA biosynthesis                     | Glycan Biosynthesis and Metabolism        |
| 00563           | Glycosylphosphatidylinositol(GPI)-anchor biosynthesis | Glycan Biosynthesis and Metabolism        |
| 01031           | Glycan structures - biosynthesis 2                    | Glycan Biosynthesis and Metabolism        |
| 00400           | Phenylalanine, tyrosine and tryptophan biosynthesis   | Amino Acid Metabolism                     |
| 00330           | Arginine and proline metabolism                       | Amino Acid Metabolism                     |
| 00530           | Aminosugars metabolism                                | Carbohydrate Metabolism                   |

No. of Pathways and names of Pathways are obtained from KEGG database.

## References

- [1] Wuchty S, Oltvai ZN, Barabasi AL (2003) Evolutionary conservation of motif constituents in the yeast protein interaction network. *Nat Genet.* 35(2):176-9
- [2] Watts DJ, Strogatz SH (1998) Collective dynamics of 'small-world' networks. *Nature.* 393(6684):440-2.
- [3] Vazquez A, Dobrin R, Sergi D, Eckmann JP, Oltvai ZN, et al. (2004) The topological relationship between the large-scale attributes and local interaction patterns of complex networks. *Proc Natl Acad Sci U S A.*101(52):17940-5.
- [4] Dobrin R, Beg QK, Barabasi AL, Oltvai ZN (2004)Aggregation of topological motifs in the *Escherichia coli* transcriptional regulatory network. *BMC Bioinformatics.* 30;5:10. 1. Harris MA,
- [5] Clark J, Ireland A, Lomax J, Ashburner M, et al. (2004) The Gene Ontology (GO) database and informatics resource. *Nucleic Acids Res* 32: D258-261.
