# Supplementary material for: Hubs with Network Motifs Organize Modularity Dynamically in the Protein-Protein Interaction Network of Yeast
Source: PubMed Central journal article supplement (PMC2065901; doi:10.1371/journal.pone.0001207), 2007-11-21
Supplement: pone.0001207.s002.pdf [file pone.0001207.s002.pdf]

Table S1

| mDHs: | mDH     | Degree | Motif density | Complex_ratio-same | Localization_ratio-same | Function_ratio-same |
|-------|---------|--------|---------------|--------------------|-------------------------|---------------------|
|       | CDC28   | 71     | 4.423         | 0.04               | 0.650                   |                     |
|       | RPO21   | 40     | 21.225        | 0.26               | 0.940                   | 0.19                |
|       | ACT1    | 33     | 3.424         | 0.08               |                         | 0.00                |
|       | NUP116  | 30     | 27.667        | 0.01               | 0.030                   | 0.17                |
|       | BRR2    | 28     | 42.214        | 0.10               | 0.770                   | 0.66                |
|       | PSE1    | 27     | 13.185        | 0.15               | 0.280                   | 0.00                |
|       | RAD23   | 26     | 32.846        | 0.13               | 0.790                   | 0.00                |
|       | SMT3    | 24     | 1.708         | 0.00               | 0.420                   | 0.00                |
|       | NUP100  | 24     | 25.583        | 0.01               | 0.130                   | 0.14                |
|       | HHF1    | 23     | 3.174         | 0.23               | 0.420                   | 0.01                |
|       | PRP31   | 23     | 29.609        | 0.42               | 0.730                   | 0.70                |
|       | KAP95   | 23     | 20.000        | 0.02               | 0.220                   | 0.00                |
|       | SNU114  | 23     | 41.391        | 0.44               | 0.720                   | 0.68                |
|       | RPB3    | 22     | 29.682        | 0.21               | 0.790                   | 0.30                |
|       | CMD1    | 22     | 1.227         | 0.14               | 0.100                   | 0.00                |
|       | PAB1    | 22     | 12.318        | 0.00               | 0.110                   | 0.00                |
|       | LSM8    | 22     | 35.000        | 0.01               | 0.650                   | 0.67                |
|       | STO1    | 21     | 6.905         | 0.24               | 0.330                   | 0.03                |
|       | SRP1    | 21     | 15.810        | 0.02               | 0.220                   | 0.00                |
|       | ADA2    | 20     | 41.650        | 0.47               | 0.950                   | 0.00                |
|       | SEC22   | 20     | 14.050        | 0.00               | 0.390                   | 0.06                |
|       | PRP19   | 20     | 26.350        | 0.49               | 0.790                   | 0.37                |
|       | NUP42   | 20     | 20.650        | 0.00               |                         | 0.16                |
|       | RPB2    | 19     | 21.158        | 0.37               | 0.960                   | 0.40                |
|       | HSP82   | 19     | 2.421         | 0.00               | 0.980                   | 0.09                |
|       | NUP57   | 19     | 31.158        | 0.01               | 0.200                   | 0.16                |
|       | GAL4    | 18     | 31.722        | 0.00               |                         | 0.00                |
|       | RPG1    | 18     | 10.667        | 0.42               | 0.720                   | 0.54                |
|       | NUP49   | 18     | 32.000        | 0.01               | 0.210                   | 0.19                |
|       | PRP4    | 18     | 42.333        | 0.46               | 0.730                   | 0.74                |
|       | TIF4631 | 17     | 5.882         | 0.14               | 0.430                   | 0.17                |
|       | LSM4    | 17     | 41.882        | 0.39               | 0.560                   | 0.61                |
|       | SIN3    | 16     | 2.750         | 0.41               | 0.000                   | 0.02                |
|       | YKT6    | 16     | 11.938        | 0.08               |                         | 0.11                |
|       | STE11   | 16     | 3.875         | 0.20               | 0.630                   | 0.00                |
|       | LSM7    | 16     | 35.313        | 0.31               | 0.450                   | 0.53                |
|       | PRP6    | 16     | 42.000        | 0.47               | 0.780                   | 0.78                |
|       | SED5    | 16     | 10.938        | 0.00               |                         | 0.00                |
|       | RPO26   | 16     | 27.313        | 0.47               | 0.620                   | 0.85                |
|       | SKP1    | 16     | 4.125         | 0.12               | 1.000                   | 0.11                |
|       | LSM3    | 16     | 40.375        | 0.23               | 0.560                   | 0.09                |
|       | GSP1    | 16     | 13.750        | 0.00               |                         | 0.00                |
|       | PHO85   | 16     | 0.563         | 0.00               | 0.750                   | 0.00                |
|       | SEC17   | 15     | 10.733        | 0.14               |                         | 0.00                |
|       | SMD1    | 15     | 27.467        | 0.45               | 0.930                   | 0.59                |
|       | LSM2    | 15     | 37.067        | 0.32               | 0.510                   | 0.53                |
|       | LSM6    | 15     | 40.000        | 0.34               |                         | 0.58                |
|       | RAD3    | 15     | 8.067         | 0.17               | 0.590                   | 0.17                |
|       | COP1    | 15     | 15.600        | 0.15               | 0.260                   | 0.04                |
|       | NOP58   | 15     | 1.000         | 0.40               | 0.000                   | 0.00                |
|       | NSP1    | 15     | 11.533        | 0.02               | 0.190                   | 0.18                |
|       | BET1    | 15     | 14.200        | 0.00               | 0.000                   | 0.04                |
|       | CBF5    | 15     | 4.467         | 0.31               | 0.050                   | 0.00                |
|       | CKB2    | 15     | 9.333         | 0.23               | 0.580                   | 0.00                |
|       | KEM1    | 15     | 19.667        | 0.06               | 0.500                   | 0.00                |
|       | LSM5    | 14     | 38.429        | 0.32               |                         | 0.55                |
|       | SSA1    | 14     | 5.714         | 0.00               | 0.340                   | 0.01                |
|       | NIP1    | 14     | 12.214        | 0.42               | 0.650                   | 0.44                |
|       | LAS17   | 14     | 5.357         | 0.16               | 0.390                   | 0.04                |

Table S1

|                                                                                                      |       |        |        |       |       |      |
|------------------------------------------------------------------------------------------------------|-------|--------|--------|-------|-------|------|
| HSC82                                                                                                | 14    | 2.357  | 0.00   | 0.910 | 0.09  |      |
| SUA7                                                                                                 | 14    | 9.429  | 0.43   | 0.290 | 0.04  |      |
| CLB2                                                                                                 | 13    | 6.538  | 0.05   | 0.530 | 0.00  |      |
| CKB1                                                                                                 | 13    | 8.462  | 0.35   | 0.630 | 0.00  |      |
| SPT16                                                                                                | 13    | 5.692  | 0.47   | 0.780 | 0.00  |      |
| RVB2                                                                                                 | 13    | 5.231  | 0.19   |       | 0.06  |      |
| PRP3                                                                                                 | 13    | 39.154 | 0.43   | 0.870 | 0.78  |      |
| DCP1                                                                                                 | 13    | 18.769 | 0.00   | 0.010 | 0.00  |      |
| CDC42                                                                                                | 13    | 3.385  | 0.00   |       | 0.02  |      |
| SNF1                                                                                                 | 13    | 2.385  | 0.32   | 0.640 | 0.00  |      |
| NUP1                                                                                                 | 13    | 14.846 | 0.01   | 0.080 | 0.01  |      |
| MYO5                                                                                                 | 13    | 6.308  | 0.00   | 0.390 | 0.00  |      |
| NAM7                                                                                                 | 13    | 3.000  | 0.03   | 0.240 | 0.00  |      |
| CRM1                                                                                                 | 13    | 17.154 | 0.00   | 0.030 | 0.00  |      |
| NOP1                                                                                                 | 13    | 3.769  | 0.33   |       | 0.00  |      |
| RPD3                                                                                                 | 12    | 2.750  | 0.47   | 0.360 | 0.03  |      |
| SEC23                                                                                                | 12    | 7.583  | 0.19   |       | 0.00  |      |
| STE5                                                                                                 | 12    | 3.833  | 0.28   | 0.480 | 0.00  |      |
| BEM1                                                                                                 | 12    | 5.167  | 0.03   | 0.030 | 0.00  |      |
| CKA1                                                                                                 | 12    | 8.583  | 0.31   | 0.580 | 0.00  |      |
| POL1                                                                                                 | 12    | 2.333  | 0.37   | 0.640 | 0.00  |      |
| RPB8                                                                                                 | 12    | 26.500 | 0.45   | 0.630 | 0.90  |      |
| SEC31                                                                                                | 12    | 4.000  | 0.23   | 0.110 | 0.02  |      |
| RAD51                                                                                                | 12    | 0.917  | 0.09   | 0.440 | 0.00  |      |
| TFC4                                                                                                 | 12    | 4.667  | 0.23   | 0.970 | 0.27  |      |
| CEF1                                                                                                 | 12    | 21.083 | 0.42   | 0.670 | 0.44  |      |
| BNI1                                                                                                 | 12    | 3.250  | 0.00   | 0.360 | 0.03  |      |
| ARP4                                                                                                 | 12    | 6.333  | 0.17   | 0.730 | 0.05  |      |
| ARP2                                                                                                 | 12    | 6.667  | 0.44   | 0.000 | 0.05  |      |
| SIR4                                                                                                 | 12    | 1.583  | 0.07   | 0.080 | 0.00  |      |
| PRP43                                                                                                | 12    | 11.583 | 0.27   | 0.000 | 0.41  |      |
| CDC53                                                                                                | 12    | 5.000  | 0.10   | 1.000 | 0.12  |      |
| KAP104                                                                                               | 12    | 22.000 | 0.00   | 0.020 | 0.00  |      |
| CDC25                                                                                                | 12    | 1.917  | 0.13   | 0.810 | 0.00  |      |
| CEG1                                                                                                 | 12    | 3.667  | 0.16   | 0.450 | 0.00  |      |
| NUP145                                                                                               | 12    | 25.083 | 0.06   | 0.300 | 0.45  |      |
| SIC1                                                                                                 | 12    | 6.417  | 0.13   | 0.850 | 0.01  |      |
| TIF4632                                                                                              | 12    | 7.167  | 0.10   | 0.420 | 0.20  |      |
| CUS1                                                                                                 | 12    | 17.167 | 0.46   | 0.690 | 0.02  |      |
| <b>mPHs: mPH Degree Motif density Complex_ratio-same Localization_ratio-same Function_ratio-same</b> |       |        |        |       |       |      |
|                                                                                                      | SPT15 | 40     | 30.175 | 0.54  |       | 0.25 |
|                                                                                                      | TAF10 | 36     | 33.750 | 0.60  | 0.990 | 0.24 |
|                                                                                                      | TAF14 | 34     | 24.118 | 0.52  | 0.980 | 0.44 |
|                                                                                                      | PRE1  | 30     | 48.867 | 0.69  |       | 0.36 |
|                                                                                                      | RPN10 | 28     | 50.250 | 0.70  | 0.840 | 0.32 |
|                                                                                                      | TAF6  | 27     | 47.815 | 0.54  | 0.930 | 0.22 |
|                                                                                                      | SRB6  | 27     | 51.630 | 0.82  | 0.810 | 0.52 |
|                                                                                                      | GLC7  | 26     | 6.462  | 0.94  | 0.980 | 0.00 |
|                                                                                                      | PRP8  | 26     | 38.538 | 0.50  | 0.760 | 0.64 |
|                                                                                                      | TAF5  | 25     | 46.080 | 0.60  | 0.930 | 0.25 |
|                                                                                                      | MRPL9 | 25     | 7.360  | 0.85  | 0.700 | 0.85 |
|                                                                                                      | RGR1  | 24     | 51.125 | 0.78  | 0.840 | 0.58 |
|                                                                                                      | SRB5  | 24     | 53.458 | 0.77  | 0.830 | 0.52 |
|                                                                                                      | MED7  | 23     | 48.391 | 0.87  | 0.800 | 0.68 |
|                                                                                                      | TAF12 | 23     | 51.565 | 0.59  | 0.930 | 0.24 |
|                                                                                                      | RPC40 | 23     | 23.391 | 0.82  | 0.320 | 0.88 |
|                                                                                                      | RPT3  | 22     | 44.955 | 0.63  | 0.000 | 0.17 |
|                                                                                                      | RPN5  | 22     | 49.409 | 0.74  | 0.820 | 0.00 |
|                                                                                                      | SRB4  | 22     | 51.591 | 0.82  | 0.830 | 0.58 |

Table S1

|        |    |        |      |       |      |
|--------|----|--------|------|-------|------|
| MED2   | 22 | 47.818 | 0.89 | 0.780 | 0.64 |
| RPT6   | 22 | 45.318 | 0.59 | 0.800 | 0.17 |
| TAF9   | 21 | 50.190 | 0.66 | 0.990 | 0.27 |
| RPT1   | 21 | 48.571 | 0.66 | 0.820 | 0.20 |
| MRPL10 | 21 | 8.524  | 0.76 | 0.520 | 0.70 |
| GAL11  | 21 | 45.714 | 0.84 | 0.830 | 0.63 |
| RPB5   | 21 | 26.571 | 0.50 |       | 0.85 |
| RPN9   | 20 | 47.800 | 0.65 | 0.810 | 0.00 |
| PGD1   | 20 | 47.200 | 0.80 | 0.820 | 0.64 |
| RPN1   | 20 | 49.850 | 0.60 | 0.800 | 0.17 |
| ROX3   | 20 | 49.850 | 0.96 | 0.780 | 0.71 |
| MED8   | 20 | 47.200 | 0.86 | 0.000 | 0.69 |
| RPN8   | 19 | 47.632 | 0.69 | 0.820 | 0.00 |
| RPA135 | 19 | 8.000  | 0.67 | 0.560 | 0.75 |
| RPN12  | 18 | 50.444 | 0.68 | 0.810 | 0.21 |
| SMD3   | 18 | 36.444 | 0.50 |       | 0.73 |
| RPN11  | 18 | 44.222 | 0.66 | 0.790 | 0.19 |
| RPO31  | 18 | 21.222 | 0.80 | 0.500 | 0.85 |
| RNA14  | 17 | 14.235 | 0.74 | 0.930 | 0.33 |
| SPT7   | 17 | 32.353 | 0.66 | 0.990 | 0.00 |
| MED4   | 17 | 46.353 | 0.87 | 0.820 | 0.69 |
| MSH6   | 17 | 4.118  | 0.80 | 0.910 | 0.03 |
| RPN6   | 17 | 49.882 | 0.67 | 0.800 | 0.00 |
| TRA1   | 17 | 33.706 | 0.64 |       | 0.00 |
| SRB2   | 17 | 36.412 | 0.85 | 0.780 | 0.74 |
| SPC24  | 17 | 0.471  | 1.00 | 0.500 | 0.50 |
| NGG1   | 16 | 36.688 | 0.62 | 0.990 | 0.02 |
| TFP1   | 16 | 8.438  | 0.98 | 0.700 | 0.92 |
| SIN4   | 16 | 45.688 | 0.94 | 0.800 | 0.72 |
| GCN5   | 16 | 35.438 | 0.64 | 0.950 | 0.00 |
| MRPL16 | 16 | 8.875  | 0.77 | 0.710 | 0.76 |
| CSE2   | 16 | 51.000 | 0.96 | 0.820 | 0.77 |
| PRE6   | 15 | 29.267 | 0.77 | 0.990 | 0.77 |
| RPC25  | 15 | 26.467 | 0.80 |       | 0.87 |
| RPT5   | 15 | 47.533 | 0.58 | 0.770 | 0.19 |
| MED6   | 15 | 52.000 | 0.93 | 0.810 | 0.73 |
| SPT8   | 15 | 39.267 | 0.62 | 0.990 | 0.02 |
| TAF13  | 15 | 31.200 | 0.81 | 0.900 | 0.61 |
| RPN3   | 15 | 49.067 | 0.62 | 0.790 | 0.00 |
| PRE2   | 15 | 29.067 | 0.79 | 1.000 | 0.75 |
| PRE8   | 15 | 26.933 | 0.71 | 0.990 | 0.81 |
| CDC27  | 14 | 11.429 | 0.88 | 0.730 | 0.62 |
| SSN3   | 14 | 25.357 | 0.76 |       | 0.00 |
| NUT1   | 14 | 48.857 | 0.95 | 0.790 | 0.00 |
| POP2   | 14 | 3.786  | 0.75 | 0.930 | 0.57 |
| SPP381 | 14 | 25.071 | 0.53 | 0.830 | 0.56 |
| RPC34  | 14 | 21.000 | 0.81 |       | 0.82 |
| SPT20  | 14 | 41.929 | 0.62 | 0.990 | 0.02 |
| RPA190 | 14 | 15.929 | 0.69 | 0.440 | 0.88 |
| SPT3   | 14 | 41.929 | 0.62 | 0.990 | 0.02 |
| TAF1   | 14 | 37.429 | 0.84 | 0.960 | 0.55 |
| SCL1   | 14 | 27.071 | 0.83 | 0.980 | 0.65 |
| PAP1   | 14 | 13.714 | 0.96 | 0.920 | 0.00 |
| SRB7   | 14 | 46.571 | 0.95 | 0.800 | 0.76 |
| CFT1   | 13 | 17.308 | 0.88 | 0.990 | 0.37 |
| MYO2   | 13 | 2.769  | 0.68 | 0.150 | 0.06 |
| RPC53  | 13 | 25.000 | 0.80 | 0.500 | 0.86 |
| TAF2   | 13 | 33.077 | 0.88 | 0.970 | 0.67 |
| RPN7   | 13 | 49.000 | 0.70 | 0.780 | 0.00 |
| TIF5   | 13 | 13.769 | 0.51 | 0.710 | 0.70 |
| REF2   | 13 | 14.308 | 0.98 | 0.940 | 0.45 |

Table S1

|                                                 |       |        |               |                    |                         |                     |
|-------------------------------------------------|-------|--------|---------------|--------------------|-------------------------|---------------------|
|                                                 | PRT1  | 13     | 11.769        | 0.56               | 0.690                   | 0.49                |
|                                                 | HFI1  | 13     | 38.846        | 0.72               | 0.990                   | 0.02                |
|                                                 | TAF11 | 13     | 34.077        | 0.85               |                         | 0.68                |
|                                                 | CDC23 | 13     | 13.154        | 0.93               | 0.730                   | 0.67                |
|                                                 | PRE10 | 13     | 22.846        | 0.75               | 1.000                   | 0.82                |
|                                                 | CFT2  | 13     | 18.692        | 0.81               | 0.990                   | 0.34                |
|                                                 | RSE1  | 13     | 15.308        | 0.52               | 0.010                   | 0.00                |
|                                                 | APC2  | 12     | 13.333        | 0.99               | 0.720                   | 0.71                |
|                                                 | RPT2  | 12     | 51.000        | 0.63               |                         | 0.22                |
|                                                 | TAF7  | 12     | 35.833        | 0.88               | 0.970                   | 0.67                |
|                                                 | RPT4  | 12     | 45.583        | 0.67               | 0.770                   | 0.21                |
|                                                 | YSH1  | 12     | 18.583        | 0.88               | 0.990                   | 0.37                |
|                                                 | TAF3  | 12     | 35.833        | 0.88               | 0.970                   | 0.67                |
|                                                 | PTA1  | 12     | 17.083        | 0.96               | 0.990                   | 0.40                |
|                                                 | TRS20 | 12     | 6.583         | 1.00               | 0.250                   | 0.89                |
|                                                 | VMA4  | 12     | 10.667        | 0.98               | 0.730                   | 0.97                |
|                                                 | MRPS5 | 12     | 2.833         | 0.94               | 0.960                   | 0.97                |
|                                                 | MSH2  | 12     | 3.583         | 0.64               | 0.930                   | 0.07                |
| mBH                                             | mBH   | Degree | Motif density | Complex_ratio-same | Localization_ratio-same | Function_ratio-same |
|                                                 | SPO12 | 12     |               |                    |                         |                     |
| Note: mBH is the hub without any network motif. |       |        |               |                    |                         |                     |
